# Supplementary material for: Recovery of Dynamics and Function in Spiking Neural Networks with Closed-Loop Control
Source: PubMed Central journal article supplement (PMC4734620; doi:10.1371/journal.pcbi.1004720), 2016-02-01
Supplement: pcbi.1004720.s002.pdf [file pcbi.1004720.s002.pdf]

| <b>Neuron Parameters</b>             |                  |                 |
|--------------------------------------|------------------|-----------------|
| Spike threshold                      | $u_{th}$         | 20 mV           |
| Reset potential                      | $u_r$            | 14 mV           |
| Resting potential                    | $u_{rest}$       | 0 mV            |
| Refractory period                    | $t_{ref}$        | 1 ms            |
| Membrane capacitance                 | $C_m$            | 250 pF          |
| Membrane time constant               | $\tau_m$         | 10 ms           |
| <b>Synaptic Parameters</b>           |                  |                 |
| Synaptic rise time                   | $\tau_r$         | 1 ms            |
| Synaptic decay time                  | $\tau_d$         | 1 ms            |
| Synaptic weight                      | $J$              |                 |
| Synaptic delay                       | $d$              | 2 ms            |
| <b>Input Parameters</b>              |                  |                 |
| <u>Inhibitory network</u>            |                  |                 |
| Input, mean - I population           | $\mu_I$          | 14 mV           |
| Input, variance - I population       | $\sigma_I$       | 6 mV            |
| <br>                                 |                  |                 |
| <u>Excitatory-Inhibitory network</u> |                  |                 |
| Input, mean - E population           | $\mu_E$          | 20.8 mV         |
| Input, mean - I population           | $\mu_I$          | 16.5 mV         |
| Input, variance - E population       | $\sigma_E$       | 20.8 mV         |
| Input, variance - I population       | $\sigma_I$       | 16.5 mV         |
| <b>Network Parameters</b>            |                  |                 |
| <u>Inhibitory network</u>            |                  |                 |
| Number of inhibitory neurons         | $N_I$            | 10,000          |
| <br>                                 |                  |                 |
| <u>Excitatory-Inhibitory network</u> |                  |                 |
| Number of excitatory neurons         | $N_E$            | 8,000           |
| Number of inhibitory neurons         | $N_I$            | 2,000           |
| <b>Control Parameters</b>            |                  |                 |
| <u>Inhibitory network</u>            |                  |                 |
| Control input                        | $I_K$            | 0 – 300 mV      |
| Control delay, direct control        | $d_c$            | 0 – 30 ms       |
| Control delay, differential control  | $d_{c1}, d_{c2}$ | 0 – 30 ms, 1 ms |
| <br>                                 |                  |                 |
| <u>Excitatory-Inhibitory network</u> |                  |                 |
| Control gain                         | $K$              | 0 – 300 mV      |
| Control delay, direct control        | $d_c$            | 0 – 30 ms       |
| Control delay, differential control  | $d_{c1}, d_{c2}$ | 0 – 30 ms, 1 ms |
